# Supplementary material
Source: HighWire-hosted journal article supplement (https://www.rcpjournals.org/highwire/filestream/10667/field_highwire_adjunct_files/1/Patel_Supplementary_material_S2.pdf)

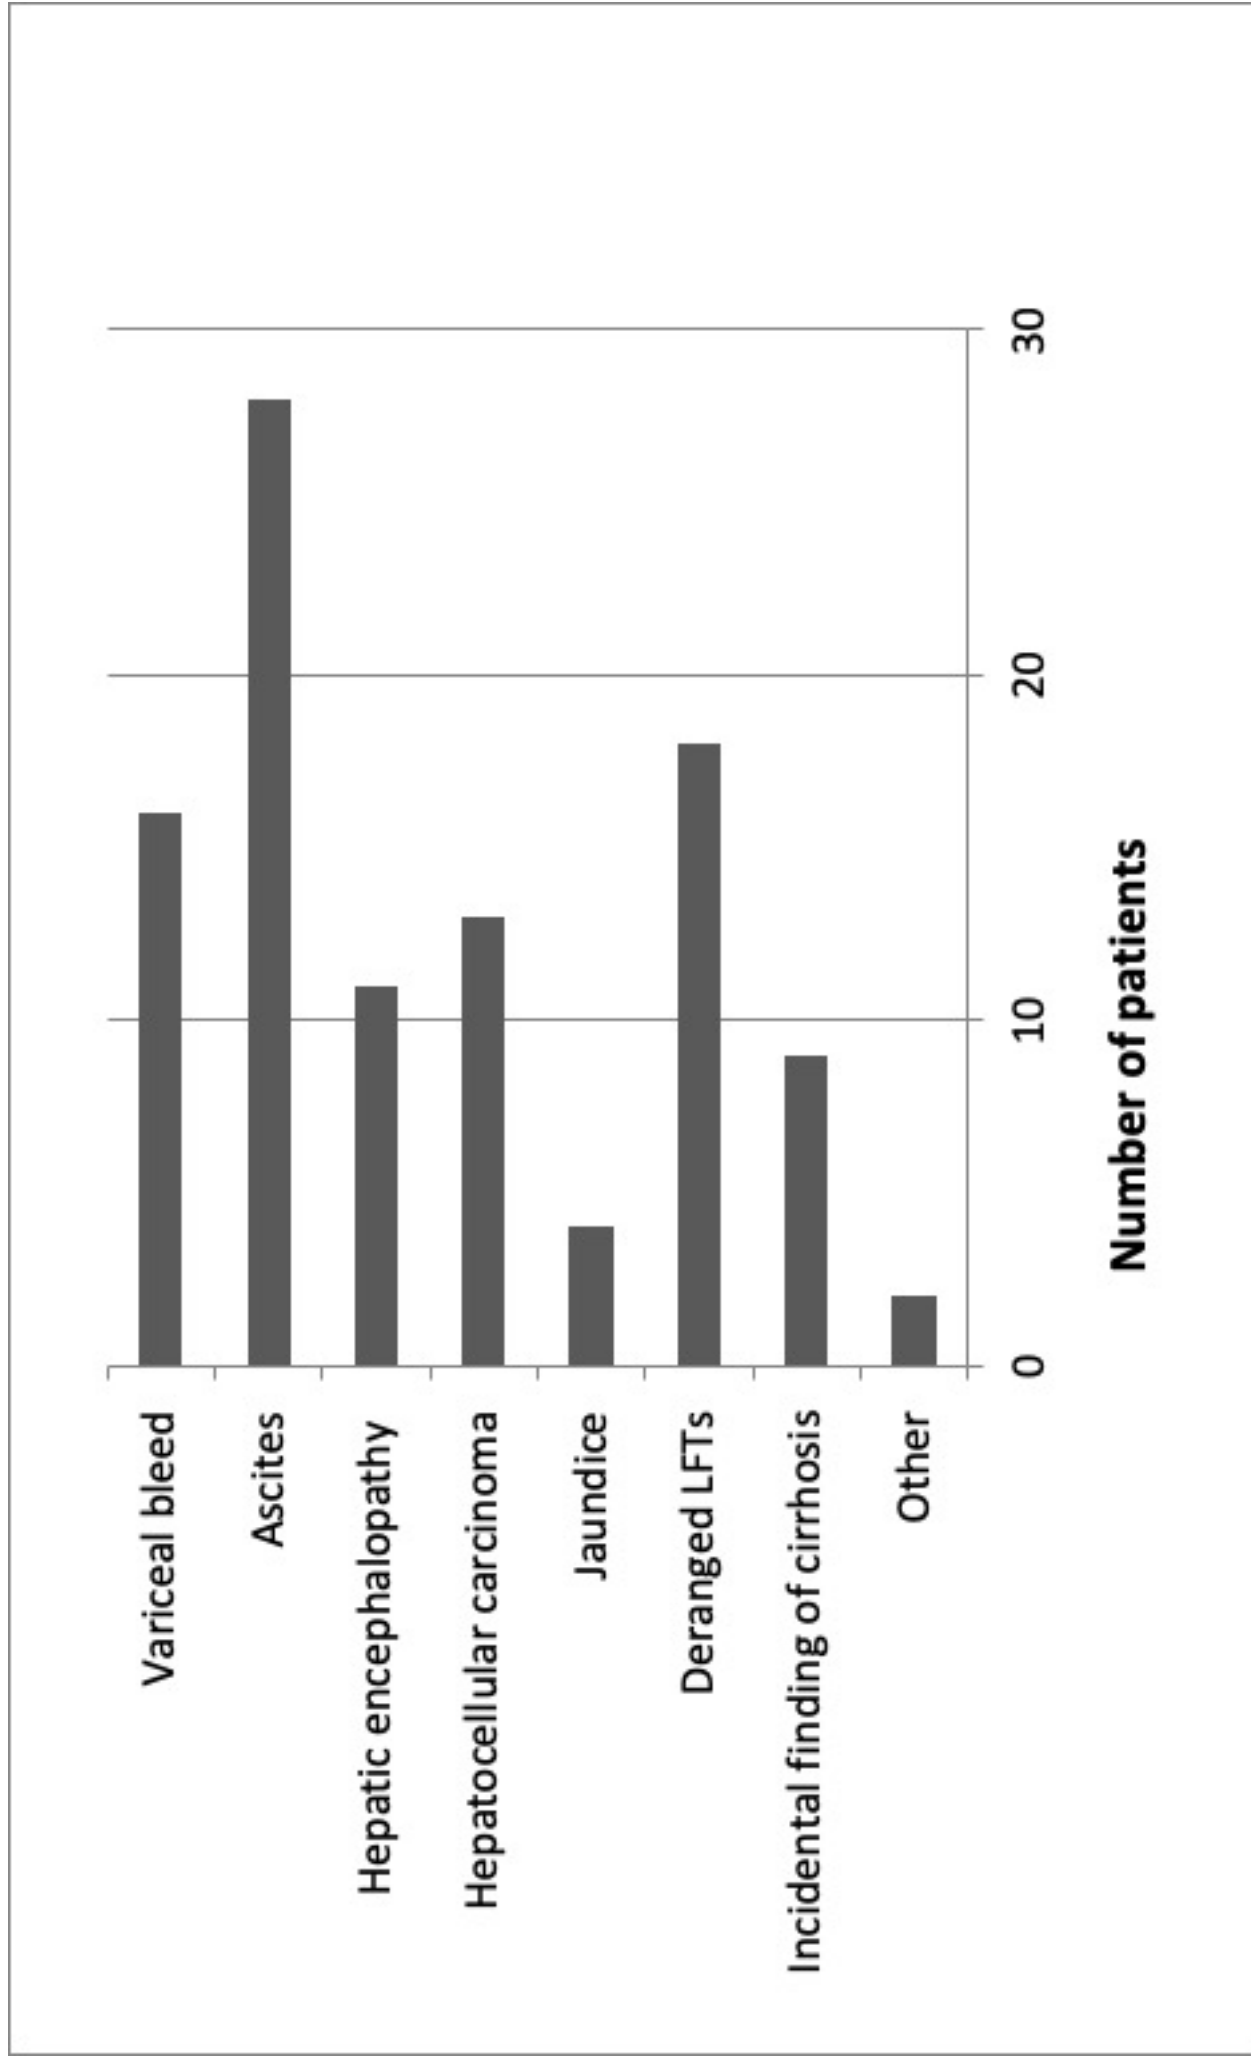

Supplement: Patel_Supplementary_material_S2.pdf [file Patel_Supplementary_material_S2.pdf]
